# Supplementary material
Source: PubMed Central journal article supplement (PMC7222626)
Supplement: NIHMS1585160-supplement-Materials_List.pdf [file NIHMS1585160-supplement-Materials_List.pdf]

Materials List for:

# A Microfluidic Platform for Stimulating Chondrocytes with Dynamic Compression

Donghee Lee<sup>1</sup>, Alek Erickson<sup>2</sup>, Andrew T. Dudley<sup>1</sup>, Sangjin Ryu<sup>3,4</sup>

<sup>1</sup>Department of Genetics, Cell Biology and Anatomy, University of Nebraska Medical Center

<sup>2</sup>Department of Physiology and Pharmacology, Karolinska Institutet

<sup>3</sup>Department of Mechanical and Materials Engineering, University of Nebraska-Lincoln

<sup>4</sup>Nebraska Center for Materials and Nanoscience, University of Nebraska-Lincoln

Correspondence to: Andrew T. Dudley at [andrew.dudley@unmc.edu](mailto:andrew.dudley@unmc.edu), Sangjin Ryu at [sangjin.ryu@unl.edu](mailto:sangjin.ryu@unl.edu)

URL: <https://www.jove.com/video/59676>

DOI: [doi:10.3791/59676](https://doi.org/10.3791/59676)

## Materials

| Name                                                              | Company                      | Catalog Number          | Comments                                                                                                                                                                                                                                                                           |
|-------------------------------------------------------------------|------------------------------|-------------------------|------------------------------------------------------------------------------------------------------------------------------------------------------------------------------------------------------------------------------------------------------------------------------------|
| (3-Aminopropyl)triethoxysilane (ATPES)                            | Sigma-Aldrich                | 741442-100ML            |                                                                                                                                                                                                                                                                                    |
| (Tridecafluoro-1, 1, 2, 2-Tetrahydrooctyl)-1-Trichlorosilane      | United Chemical Technologies | T2492-KG                |                                                                                                                                                                                                                                                                                    |
| Acrylic sheet                                                     | McMaster-Carr                | 8560K354                |                                                                                                                                                                                                                                                                                    |
| Air pump                                                          | Schwarzer Precision          | SP 500 EC-LC4.5V DC     | We used the model purchased in 2015. The internal design and performance of air pump (SP 500 EC-LC) changed in early 2016. Also, air pump performance has changed in the course of time. Thus, air pressure generated by an SP 500 EC-LC air pump should be calibrated before use. |
| Alginate powder                                                   | FMC Corporation              | Pronova UP MVG          |                                                                                                                                                                                                                                                                                    |
| Barb Straight Connectors (Metal tube)                             | Pneumadyne                   | EB40-250                |                                                                                                                                                                                                                                                                                    |
| Calcein AM                                                        | Invitrogen                   | C3100MP                 |                                                                                                                                                                                                                                                                                    |
| Dulbecco's Modified Eagle Medium (DMEM)                           | Gibco                        | 11960-044               |                                                                                                                                                                                                                                                                                    |
| Dyed red aqueous fluorescent particles                            | Thermo Fisher Scientific     | R0100                   |                                                                                                                                                                                                                                                                                    |
| EDC (1-ethyl-3-(3-dimethylaminopropyl)carbodiimide hydrochloride) | Thermo Fisher Scientific     | 22980                   |                                                                                                                                                                                                                                                                                    |
| Foam pad                                                          | GRAINGER                     | Item # 5GCE8            |                                                                                                                                                                                                                                                                                    |
| Function / Arbitrary Waveform Generator                           | Keysight Technologies        | 33210A                  |                                                                                                                                                                                                                                                                                    |
| Hydrochloric acid                                                 | Fisher Chemical              | A144-500                |                                                                                                                                                                                                                                                                                    |
| Hydrogen peroxide                                                 | Fisher BioReagents           | BP2633500               |                                                                                                                                                                                                                                                                                    |
| Isopropyl alcohol                                                 | BDH1174-4LP                  | VWR                     |                                                                                                                                                                                                                                                                                    |
| Microscope slides                                                 | Thermo Fisher Scientific     | 22-267-013              |                                                                                                                                                                                                                                                                                    |
| Plasma cleaner                                                    | Harrick Plasma               | PDC-001                 |                                                                                                                                                                                                                                                                                    |
| Polydimethylsiloxane (PDMS)                                       | Dow Corning                  | 184 SIL ELAST KIT 0.5KG |                                                                                                                                                                                                                                                                                    |
| Power supply                                                      | Keysight Technologies        | E3630A                  |                                                                                                                                                                                                                                                                                    |
| SeaKem LE Agarose                                                 | Lonza                        | 50004                   |                                                                                                                                                                                                                                                                                    |
| Sodium hydroxide                                                  | Fisher Chemical              | S318-1                  |                                                                                                                                                                                                                                                                                    |

|                                       |                          |                  |  |
|---------------------------------------|--------------------------|------------------|--|
| Solenoid manifold                     | Pneumadyne               | MSV10-1          |  |
| Solenoid valve                        | Pneumadyne               | S10MM-30-12-3    |  |
| Spin coater                           | Laurell Technologies     | WS-650Mz-23NPPB  |  |
| SU8 Developer                         | MicroChem Corp.          | Y020100 4000L1PE |  |
| SU8-100                               | MicroChem Corp.          | Y131273 0500L1GL |  |
| SU8-5                                 | MicroChem Corp.          | Y131252 0500L1GL |  |
| Sulfo-NHS (N-hydroxysulfosuccinimide) | Thermo Fisher Scientific | 24510            |  |
| Sulfuric acid                         | EMD Millipore            | MSX12445         |  |
